# Supplementary material for: Ligand-directed assembly engineering of trapezoidal {Ti5} building blocks stabilized by dimethylglyoxime
Source: Royal Society of Chemistry journal article supplement (doi:10.1039/c9dt02032b), 2019-01-01
Supplement: c9dt02032b1.pdf [file c9dt02032b1.pdf]

## Supporting Information

# Ligands directed assembly engineering of trapezoidal {Ti<sub>5</sub>} building blocks stabilized by dimethylglyoxime

Qing-Rong Ding, Gui-Lan Xu, Lei Zhang\* and Jian Zhang

State Key Laboratory of Structural Chemistry, Fujian Institute of Research on the Structure of Matter,  
Chinese Academy of Sciences, Fuzhou, Fujian 350002, P. R. China.

E-mail: [LZhang@fjirsm.ac.cn](mailto:LZhang@fjirsm.ac.cn)

### Content

|                                                                                  |            |
|----------------------------------------------------------------------------------|------------|
| <b>1. Materials and Methods</b>                                                  | <b>S2</b>  |
| <b>2. Syntheses</b>                                                              | <b>S2</b>  |
| <b>3. Structural information and physical characterization of PTC-211 to 218</b> | <b>S4</b>  |
| <b>4. General Methods for X-ray Crystallography</b>                              | <b>S12</b> |
| <b>5. A summary of crystallography data for PTC series</b>                       | <b>S13</b> |
| <b>6. References</b>                                                             | <b>S16</b> |

## 1. Materials and Methods

All reagents and solvents employed are commercially available and are used as received without further purification. Dimethylglyoxime were bought from Alfa Aesar.  $\text{Ti}(\text{O}^i\text{Pr})_4$  (96%), Terephthalic acid, 2-aminoterephthalic acid, 2-Nitroterephthalic acid, 2,5-Dihydroxyterephthalic acid, 2,6-Naphthalenedicarboxylic acid, 4,4'-Biphenyldisulfonic acid, 1,2,4,5-Benzenetetracarboxylic acid and tetrakis(4-carboxyphenyl)porphyrin were bought from Admas-beta. The phase purity of products were confirmed by PXRD using a Rigaku Dmax2500 diffractometer with Cu  $\text{K}\alpha$  radiation ( $\lambda = 1.54056 \text{ \AA}$ ) with a step size of  $5^\circ/\text{min}$ . Thermogravimetric analyses (TGA) were performed using a NETSCH STA-449C thermoanalyzer with a heating rate of  $10^\circ\text{C}/\text{min}$  under a nitrogen atmosphere. Fourier transform infrared (FT-IR) spectra were recorded with a Spectrum One FT-IR Spectrometer in the  $400\text{-}4000 \text{ cm}^{-1}$  range. The UV-vis diffuse reflection data were recorded at room temperature using a powder sample with  $\text{BaSO}_4$  as a standard on a Perkin-Elmer Lambda950 UV-vis spectrophotometer and scanned at 200-800 nm in the reflectance mode with application of the Kubelka-Munk equation,  $(F(R) = (1-R)^2/2R)$ ,<sup>1</sup> where R representing the reflectance. The elemental analyses were performed on an EA1110 CHNS-O CE elemental analyzer.

## 2. Syntheses

### Synthesis of PTC-211

Dimethylglyoxime (0.035 g, 0.3 mmol), terephthalic acid (0.033 g, 0.2 mmol), and isopropyl alcohol (6 ml) were mixed at room temperature and then dropwise  $\text{Ti}(\text{O}^i\text{Pr})_4$  (0.5 ml, 1.6 mmol) was added. The resultant solution was heated at  $100^\circ\text{C}$  for three days in a glass vial with a polyethylene screw cap. After cooling to and kept at room temperature for a week, yellow rod-like crystals of **PTC-211** were obtained (yield: 70% based on dimethylglyoxime). EA (%) calculated for  $\text{C}_{82}\text{H}_{170}\text{N}_4\text{O}_{36}\text{Ti}_{10}$  (2266.90): C, 43.44; H, 7.56; N, 2.47. Found: C, 44.03; H, 7.34; N, 2.39. FT-IR (KBr pellet,  $\text{cm}^{-1}$ ): 2975(m), 2926(w), 2867(w), 2357(w), 1688(m), 1554(s), 1370(s), 1220(s), 1006(s), 945(m), 858(s), 816(w), 738(s), 684(w), 615(w).

### Synthesis of PTC-212

It was synthesized in the same way as that of **PTC-211** except that terephthalic acid was replaced by 2-aminoterephthalic acid (0.036 g, 0.2 mmol). Yellow rod-like crystals of **PTC-212** were obtained (yield: 72% based on dimethylglyoxime). EA (%) calculated for  $\text{C}_{82}\text{H}_{171}\text{N}_5\text{O}_{36}\text{Ti}_{10}$  (2281.91): C, 43.16; H, 7.55; N, 3.07. Found: C, 43.28; H, 7.46; N, 2.98. FT-IR (KBr pellet,  $\text{cm}^{-1}$ ): 3349(w), 2968(m), 2928(w), 2862(w), 2354(w), 2324(w), 1609(w), 1543(m), 1430(w), 1366(m), 1324(w), 1253(w), 1122(s), 995(s), 956(s), 858(s), 759(s), 627(s), 590(s), 558(s), 445(m).

### Synthesis of PTC-213

It was synthesized in the same way as that of **PTC-211** except that terephthalic acid was replaced by 2-Nitroterephthalic acid (0.042 g, 0.2 mmol). Yellow rod-like crystals of **PTC-213** were obtained (yield: 40% based on dimethylglyoxime). EA (%) calculated for  $\text{C}_{82}\text{H}_{169}\text{N}_5\text{O}_{38}\text{Ti}_{10}$  (2311.89): C, 42.60; H, 7.37; N, 3.03. Found: C, 42.76; H, 7.23; N, 2.96. FT-IR (KBr pellet,  $\text{cm}^{-1}$ ): 2975(m), 2926(w), 2857(w), 2352(w), 1585(m), 1543(m), 1460(w), 1376(s), 1317(m), 1131(s), 1082(m), 995(s), 955(s), 857(m), 769(m), 604(s), 456(m).

### Synthesis of PTC-214

It was synthesized in the same way as that of **PTC-211** except that terephthalic acid was replaced by 2,6-Naphthalenedicarboxylic acid (0.043 g, 0.2 mmol). Yellow rod-like crystals of **PTC-214** were obtained (yield: 47% based on dimethylglyoxime). EA (%) calculated for  $\text{C}_{86}\text{H}_{172}\text{N}_4\text{O}_{36}\text{Ti}_{10}$  (2316.95): C, 44.58; H, 7.48; N, 2.42. Found: C, 44.65; H, 7.41; N, 2.36. FT-IR (KBr pellet,  $\text{cm}^{-1}$ ): 2989(w), 2356(w), 2324(w), 1619(m), 1541(m), 1492(w), 1404(s), 1355(s), 1195(s), 1068(m), 960(w), 924(w), 764(m), 647(w), 569(w), 461(m).

### Synthesis of PTC-215

It was synthesized in the same way as that of **PTC-211** except that terephthalic acid was replaced by 4,4'-Biphenyldisulfonic acid (0.064 g, 0.2 mmol). Yellow rod-like crystals of **PTC-215** were obtained (yield: 77% based on Dimethylglyoxime). EA (%) calculated for  $C_{86}H_{174}N_4O_{38}S_2Ti_{10}$  (2415.10): C, 42.77; H, 7.26; N, 2.32. Found: C, 42.84; H, 7.23; N, 2.28. FT-IR (KBr pellet,  $cm^{-1}$ ): 2968(m), 2928(w), 2870(w), 2360(m), 2332(m), 1608(m), 1460(w), 1373(m), 1324(w), 1266(w), 1138(s), 992(s), 953(s), 845(m), 757(m), 718(m), 591(s), 463(m).

### Synthesis of PTC-216

Dimethylglyoxime (0.035 g, 0.3 mmol), 2,5-Dihydroxyterephthalic acid (0.040 g, 0.2 mmol), and isopropyl alcohol (6 ml) were mixed at room temperature and then dropwise  $Ti(O^iPr)_4$  (0.5 ml, 1.6 mmol) was added. The resultant solution was heated at 100°C for three days. After cooled to room temperature, red block crystals of **PTC-216** were obtained (yield: 80% based on dimethylglyoxime). EA (%) calculated for  $C_{111}H_{220}O_{57}N_4Ti_{16}$  (3288.79): C, 40.53; H, 6.74; N, 1.71. Found: C, 40.37; H, 6.78; N, 1.61. FT-IR (KBr pellet,  $cm^{-1}$ ): 2971(m), 2932(w), 2873(w), 2364(w), 1611(m), 1552(m), 1445(s), 1366(m), 1327(m), 1249(m), 1220(w), 1141(s), 1005(s), 907(m), 828(m), 780(w), 672(w), 613(s), 466(m).

### Synthesis of PTC-217

It was synthesized in the same way as that of **PTC-211** except that terephthalic acid was replaced by 1,2,4,5-Benzenetetracarboxylic acid (0.051 g, 0.2 mmol). Yellow rod-like crystals of **PTC-217** were obtained (yield: 61% based on dimethylglyoxime). EA (%) calculated for  $C_{96}H_{198}N_4O_{46}Ti_{12}$  (2718.99): C, 42.41; H, 7.34; N, 2.06. Found: C, 41.78; H, 6.93; N, 2.11. FT-IR (KBr pellet,  $cm^{-1}$ ): 2968(m), 2925(w), 2857(w), 2362(w), 2331(w), 1719(m), 1581(m), 1420(m), 1360(m), 1247(m), 1121(s), 999(s), 956(s), 853(m), 820(w), 797(w), 763(m), 590(s), 503(w), 463(w).

### Synthesis of PTC-218

It was synthesized in the same way as that of **PTC-211** except that terephthalic acid was replaced by meso-Tetra(4-carboxyphenyl)porphine (0.079 g, 0.1 mmol). Crimson block crystals of **PTC-218** were obtained (yield: 60% based on dimethylglyoxime). EA (%) calculated for  $C_{196}H_{358}O_{72}N_{12}Ti_{20}$  (4992.30): C, 47.15; N, 3.37; H, 7.23. Found: C, 47.28; N, 3.21; H, 7.16. FT-IR (KBr pellet,  $cm^{-1}$ ): 2975(m), 2916(w), 2857(w), 2358(w), 1605(m), 1543(m), 1468(w), 1390(s), 1331(m), 1135(s), 1077(m), 998(s), 959(s), 842(m), 803(w), 754(m), 725(w), 578(s), 451(m).

### 3. Structural information and physical characterization of PTC-211 to 218

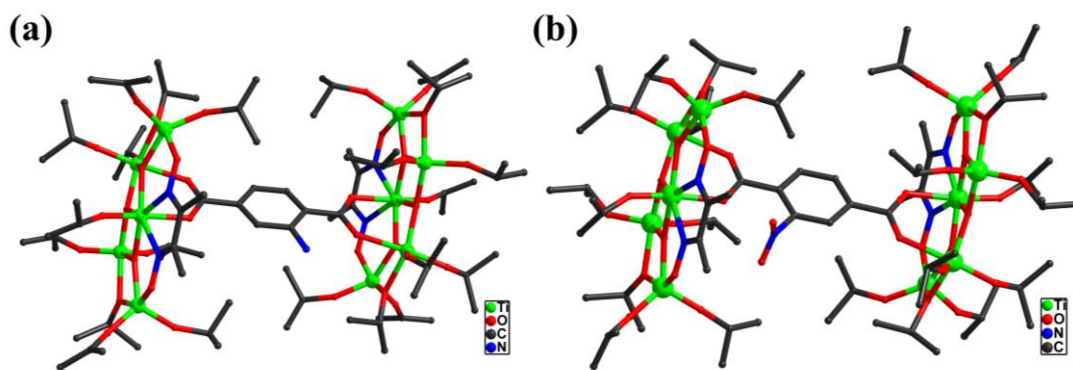

**Fig. S1** The sandwich-like  $\{Ti_{10}\}$  molecular cluster of PTC-212 (a), PTC-213 (b). All the H atoms are omitted for clarity. Color codes: green Ti; black C; red O; blue N.

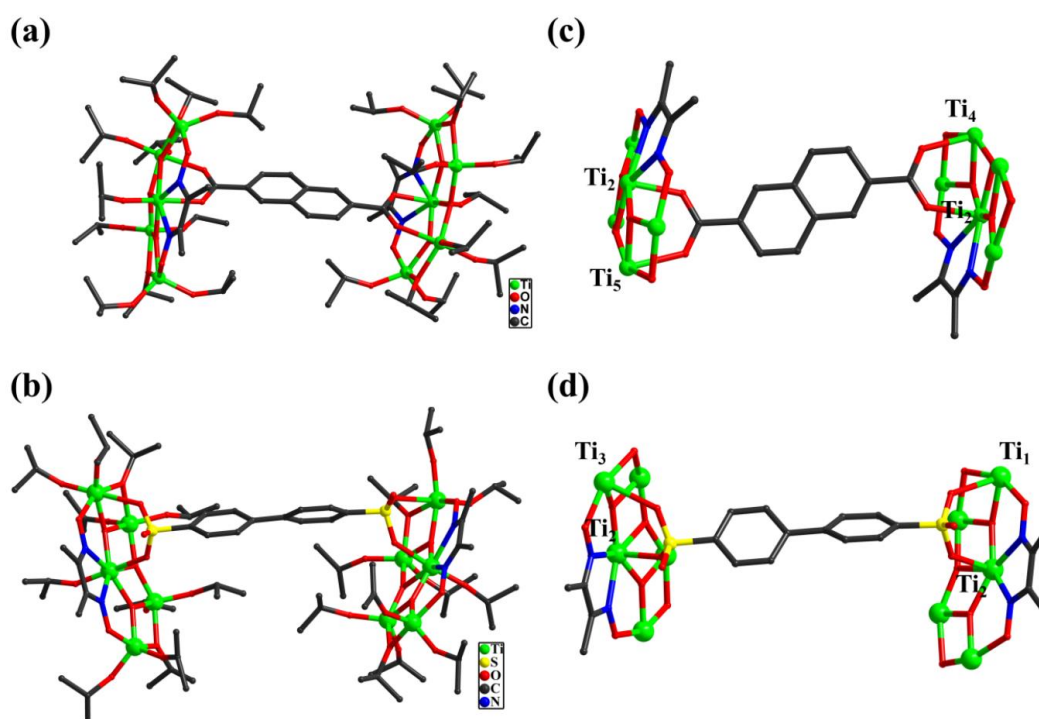

**Fig. S2** The sandwich-like  $\{Ti_{10}\}$  molecular cluster of PTC-214 (a, c) and PTC-215 (b, d) with different coordination environments. All the H atoms are omitted for clarity. Color codes: green Ti; black C; red O; yellow S; blue N.

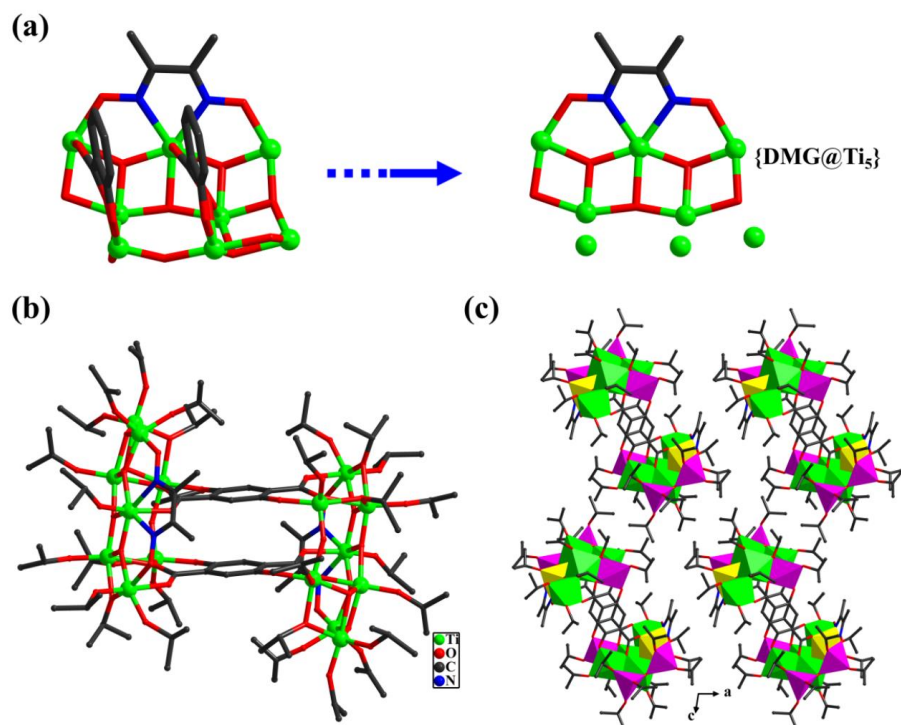

**Fig. S3** The Synthetic and structural evolution of  $\{\text{Ti}_8\}$  unit in **PTC-216** containing one  $\{\text{DMG@Ti}_5\}$  unit (a); the sandwich-like  $\{\text{Ti}_{16}\}$  molecular cluster of **PTC-216** (b); and the packing view of **PTC-216** along the b-axis (c). All the H atoms are omitted for clarity. Color codes: green Ti; black C; red O; blue N. Polyhedral color code: pink  $\text{TiO}_5$ ; green  $\text{TiO}_6$ ; yellow  $\text{TiO}_5\text{N}_2$ .

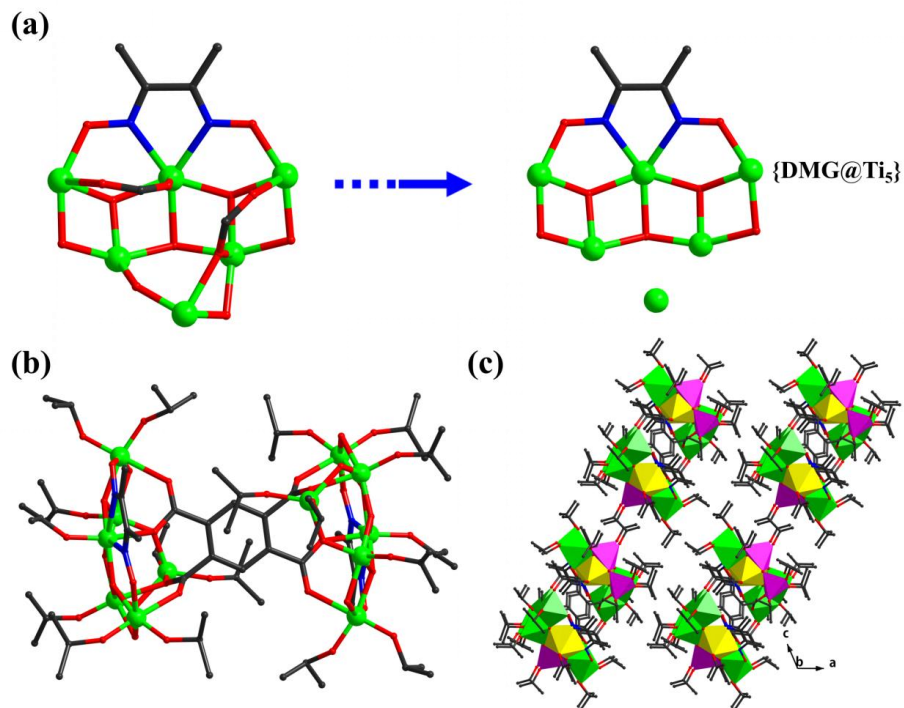

**Fig. S4** The Synthetic and structural evolution of  $\{\text{Ti}_6\}$  unit in **PTC-217** containing one  $\{\text{DMG@Ti}_5\}$  unit (a); the sandwich-like  $\{\text{Ti}_{12}\}$  molecular cluster of **PTC-217** (b); and the packing view of **PTC-217** along the b-axis (c). All the H atoms are omitted for clarity. Color codes: green Ti; black C; red O; blue N. Polyhedral color code: pink  $\text{TiO}_5$ ; green  $\text{TiO}_6$ ; yellow  $\text{TiO}_5\text{N}_2$ .

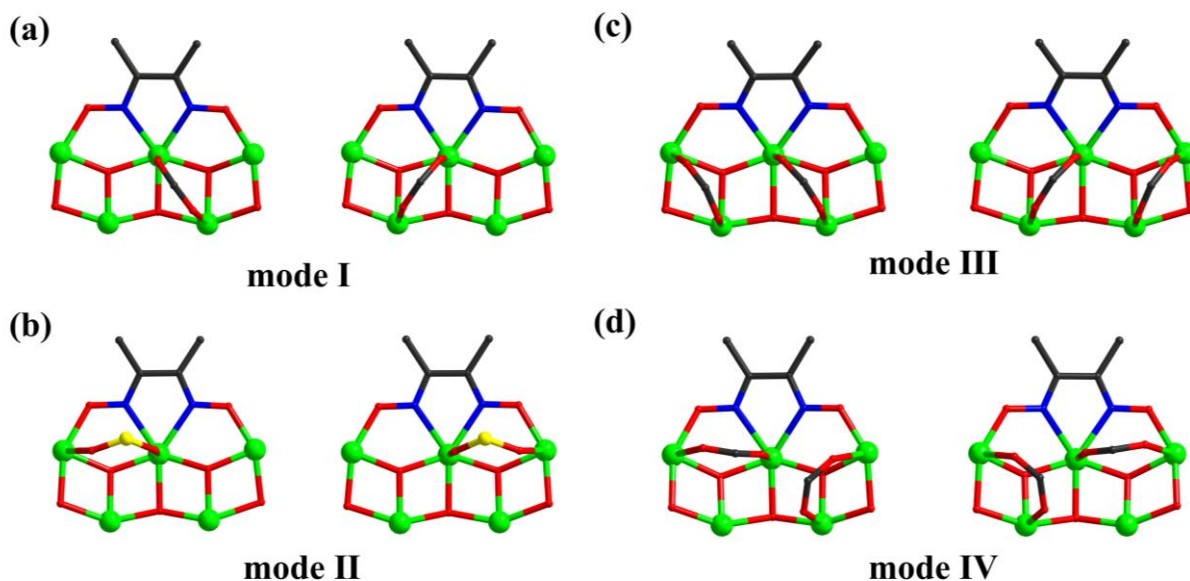

**Fig. S5** Bridging coordination modes of  $\{\text{DMG@Ti}_5\}$  unit. Color codes: green Ti; black C; red O; yellow S; blue N.

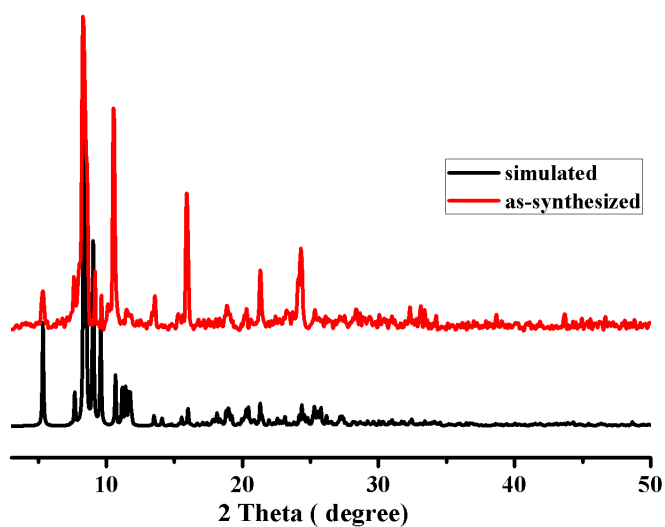

**Fig. S6** The PXRD of PTC-211: simulated pattern (black), experimental (red).

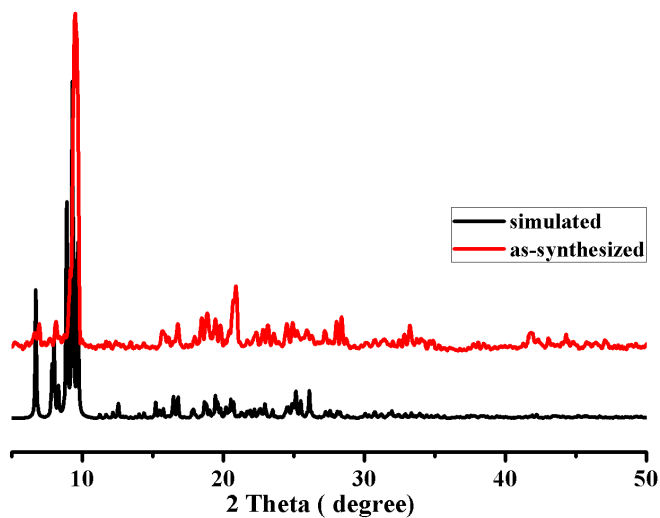

**Fig. S7** The PXRD of PTC-212: simulated pattern (black), experimental (red).

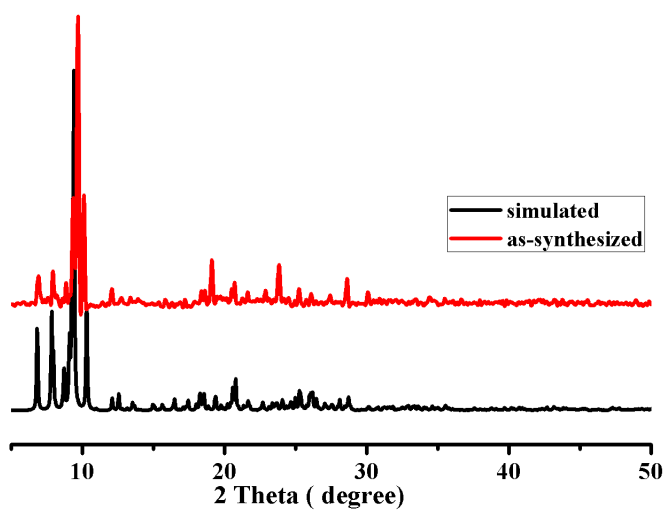

Fig. S8 The PXRD of PTC-213: simulated pattern (black), experimental (red).

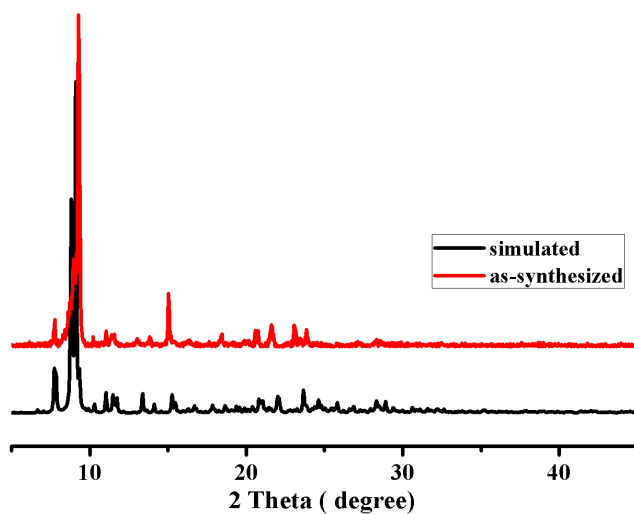

Fig. S9 The PXRD of PTC-214: simulated pattern (black), experimental (red).

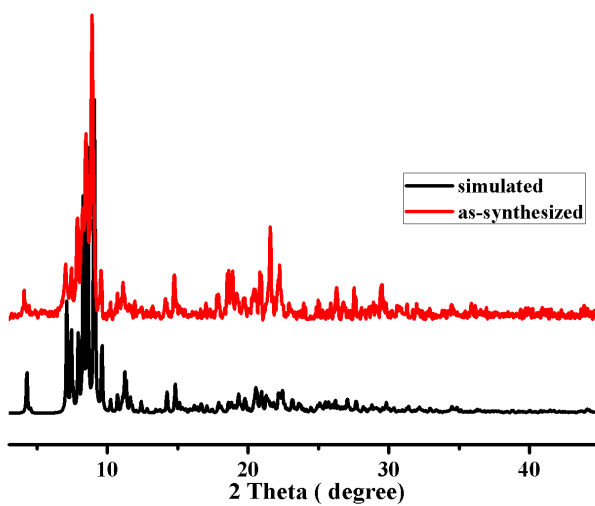

Fig. S10 The PXRD of PTC-215: simulated pattern (black), experimental (red).

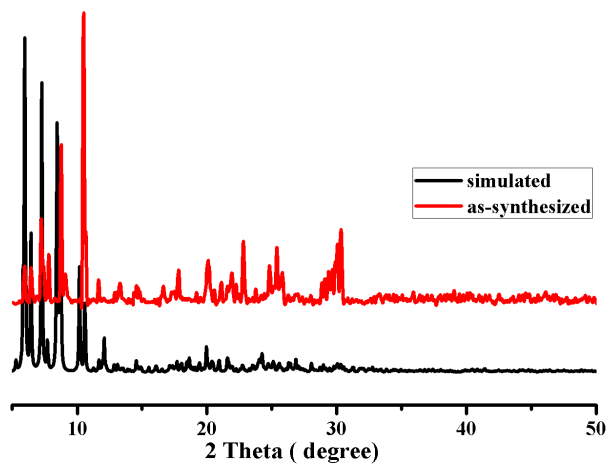

Fig. S11 The PXRD of PTC-216: simulated pattern (black), experimental (red).

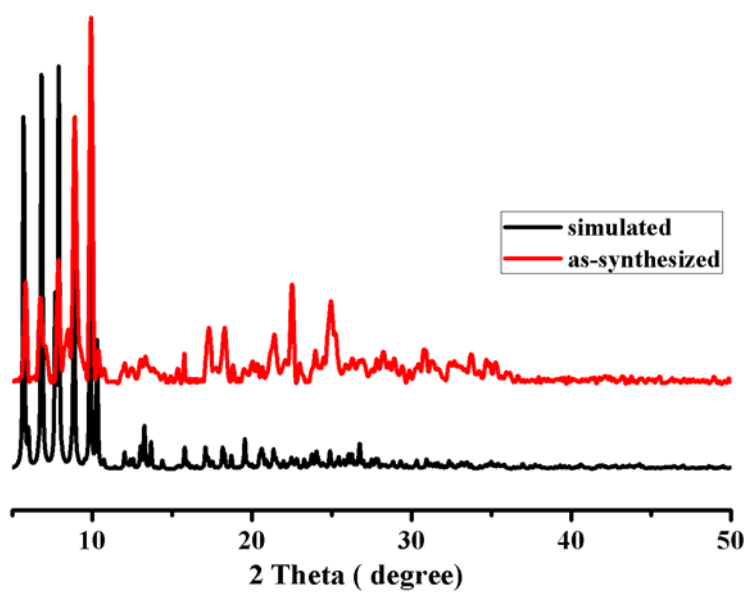

Fig. S12 The PXRD of PTC-217: simulated pattern (black), experimental (red).

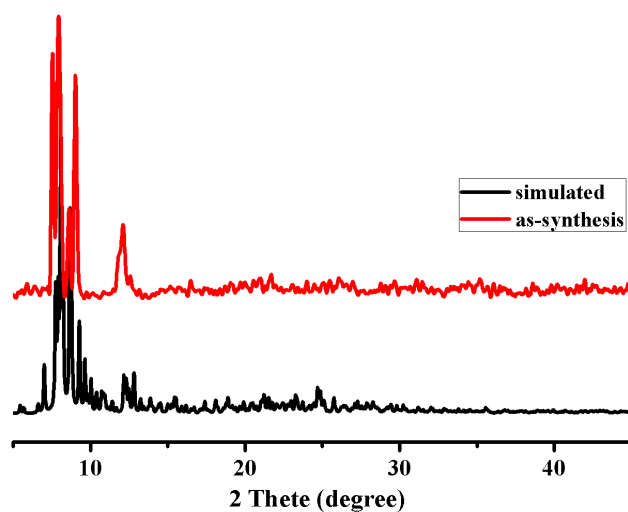

Fig. S13 The PXRD of PTC-218: simulated pattern (black), experimental (red).



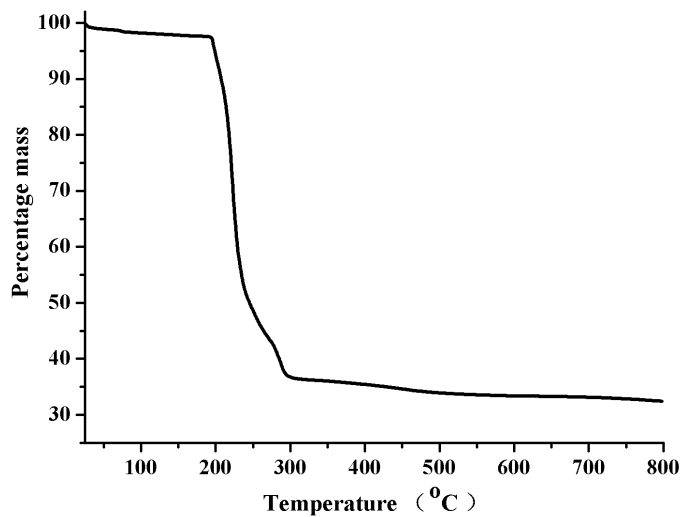

**Fig. S14** TGA curve of PTC-211.

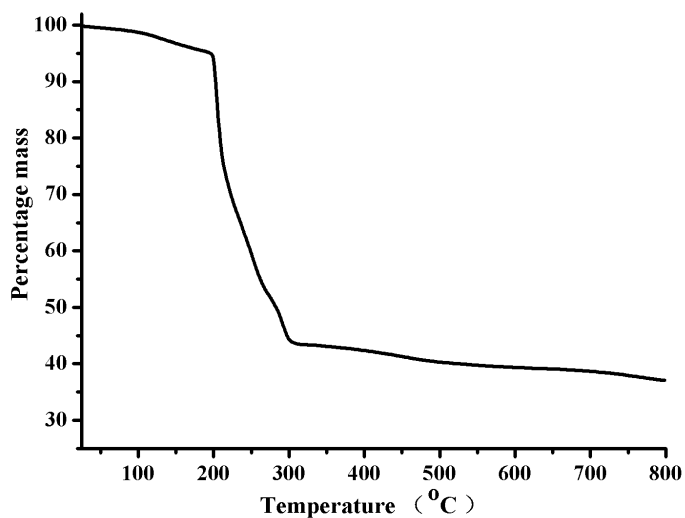

**Fig. S15** TGA curve of PTC-212.

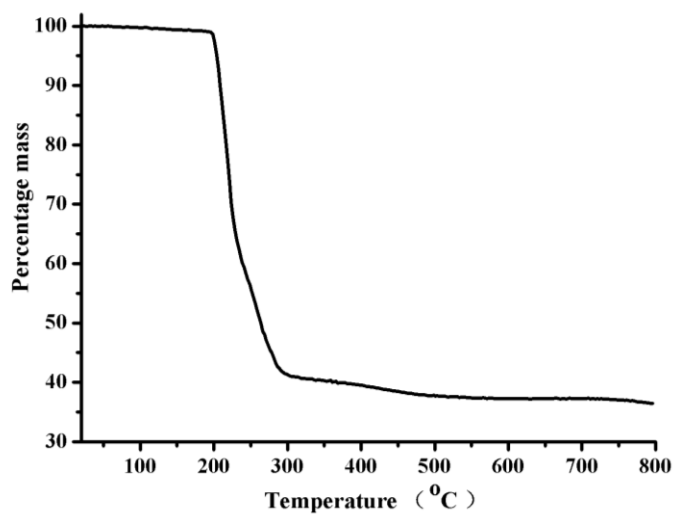

**Fig. S16** TGA curve of PTC-213.

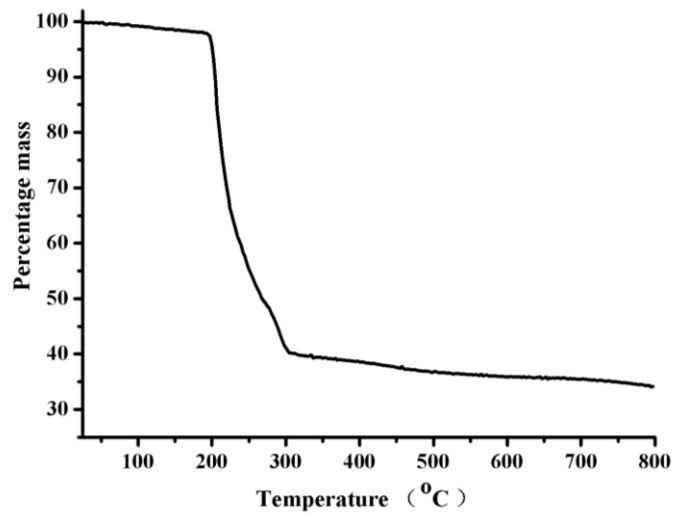

**Fig. S17** TGA curve of PTC-214.

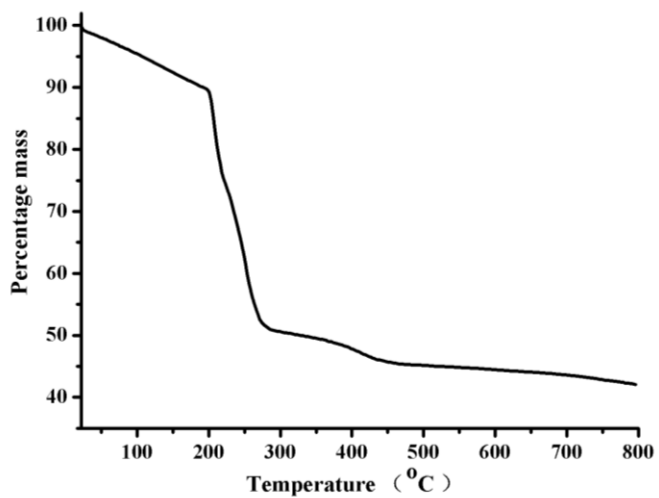

**Fig. S18** TGA curve of PTC-215.

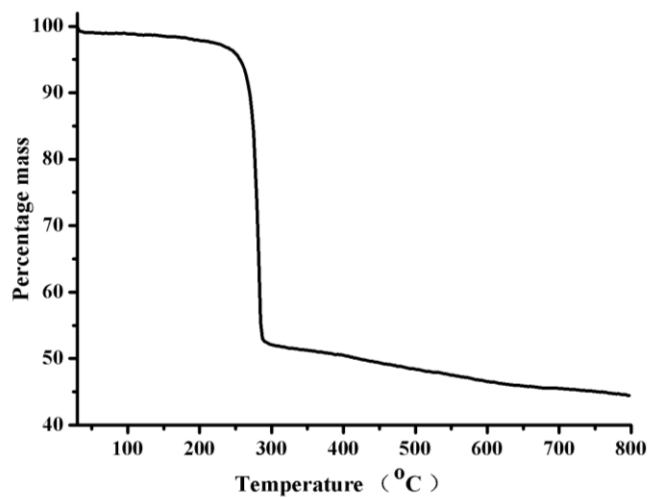

**Fig. S19** TGA curve of PTC-216.

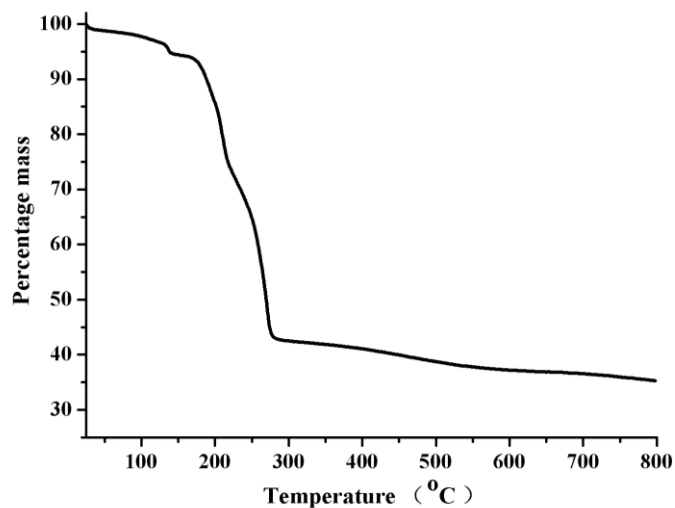

**Fig. S20** TGA curve of PTC-217.

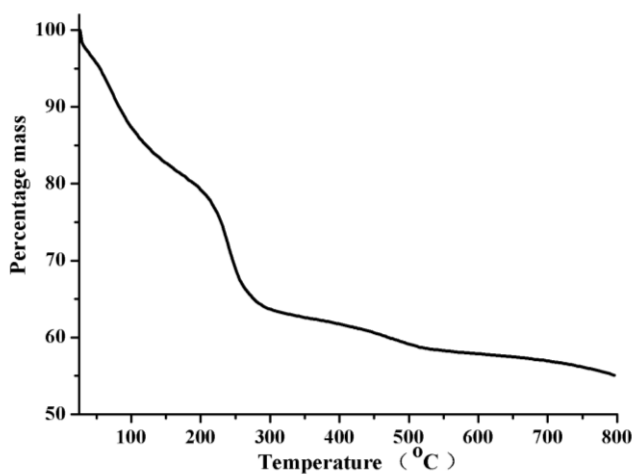

**Fig. S21** TGA curve of PTC-218.

**Table S1.** Summary of bandgaps of the reported complexes.

| No. | Complex | Bandgap | Stabilizing ligand | Bridging ligand        |
|-----|---------|---------|--------------------|------------------------|
| 1   | PTC-211 | 2.31    | DMG                | BDC                    |
| 2   | PTC-212 | 2.26    | DMG                | 2-NH <sub>2</sub> -BDC |
| 3   | PTC-213 | 2.21    | DMG                | 2-NO <sub>2</sub> -BDC |
| 4   | PTC-214 | 2.45    | DMG                | 2,6-NDC                |
| 5   | PTC-215 | 2.27    | DMG                | BPDC                   |
| 6   | PTC-216 | 1.78    | DMG                | DHPC                   |
| 7   | PTC-217 | 2.34    | DMG                | BETC                   |
| 8   | PTC-218 | 1.56    | DMG                | TCPP                   |

#### 4. General Methods for X-ray Crystallography

Crystallographic data of **PTC-214** was collected on a Mercury single crystal diffractometer equipped with graphite-monochromatic Mo K $\alpha$  radiation ( $\lambda = 0.71073 \text{ \AA}$ ). Crystallographic data of **PTC-215**, **PTC-216** and **PTC-217** were collected on a oxford XCalibur E CCD diffractometer equipped with graphite-monochromatic Mo K $\alpha$  radiation ( $\lambda = 0.71073 \text{ \AA}$ ). While crystallographic data of **PTC-211**, **PTC-212**, **PTC-213** and **PTC-218** were collected on Supernova single crystal diffractometer equipped with graphite-monochromatic Cu K $\alpha$  radiation ( $\lambda = 1.54178 \text{ \AA}$ ) at room temperature. The structures were solved with direct methods using SHELXS-97<sup>2</sup> and refined with the full-matrix least-squares technique based on  $F^2$  using the SHELXL-97<sup>3</sup>. Non-hydrogen atoms were refined anisotropically, and all hydrogen atoms bond C were generated geometrically. The X-ray crystallographic coordinates for structures reported in this article have been deposited at the Cambridge Crystallographic Data Centre (CCDC) under deposition numbers CCDC 1914954-1914961 for **PTC-211** to **PTC-218**. These data can be obtained free of charge from the Cambridge Crystallographic Data Centre via [http://www.ccdc.cam.ac.uk/data\\_request/cif](http://www.ccdc.cam.ac.uk/data_request/cif).

**5. Supplementary Table S2.** A summary of crystallography data for **PTC-211 to PTC-218**. Detailed data are given in **Tables S3** and **S4**.

| No. | Complex        | Formula                                                                                                      | M <sub>w</sub><br>(g/mol) | Sp.<br>Gr.                         | a(Å)        | b(Å)        | c(Å)        | α (°)      | β(°)       | γ (°)      | V(Å <sup>3</sup> ) | R/%   |
|-----|----------------|--------------------------------------------------------------------------------------------------------------|---------------------------|------------------------------------|-------------|-------------|-------------|------------|------------|------------|--------------------|-------|
| 1.  | <b>PTC-211</b> | Ti <sub>10</sub> O <sub>6</sub> (DMG) <sub>2</sub> (BDC)(O <sup>i</sup> Pr) <sub>22</sub>                    | 2266.90                   | <i>P</i> 2 <sub>1</sub> / <i>n</i> | 10.9245(2)  | 23.0505(6)  | 23.9209(6)  | 90         | 92.241(2)  | 90         | 6019.0(2)          | 6.87  |
| 2.  | <b>PTC-212</b> | Ti <sub>10</sub> O <sub>6</sub> (DMG) <sub>2</sub> (2-NH <sub>2</sub> -BDC)(O <sup>i</sup> Pr) <sub>22</sub> | 2281.91                   | <i>P</i> -1                        | 12.2992(10) | 14.3904(15) | 19.0996(17) | 85.923(8)  | 85.061(7)  | 66.484(9)  | 3085.7(5)          | 8.05  |
| 3.  | <b>PTC-213</b> | Ti <sub>10</sub> O <sub>6</sub> (DMG) <sub>2</sub> (2-NO <sub>2</sub> -BDC)(O <sup>i</sup> Pr) <sub>22</sub> | 2311.89                   | <i>P</i> -1                        | 11.8011(4)  | 13.8482(7)  | 18.9934(7)  | 82.343(4)  | 85.367(3)  | 70.160(4)  | 2891.6(2)          | 8.55  |
| 4.  | <b>PTC-214</b> | Ti <sub>10</sub> O <sub>6</sub> (DMG) <sub>2</sub> (2,6-NDC)(O <sup>i</sup> Pr) <sub>22</sub>                | 2316.95                   | <i>P</i> 2 <sub>1</sub> / <i>c</i> | 19.4857(4)  | 26.4883(7)  | 22.5872(5)  | 90         | 94.059(2)  | 90         | 11629.0(5)         | 7.71  |
| 5.  | <b>PTC-215</b> | Ti <sub>10</sub> O <sub>6</sub> (DMG) <sub>2</sub> (BPDC)(O <sup>i</sup> Pr) <sub>22</sub>                   | 2415.10                   | <i>P</i> -1                        | 13.1334(4)  | 23.0232(10) | 23.9960(11) | 63.989(4)  | 78.288(3)  | 82.373(3)  | 6377.2(5)          | 8.43  |
| 6.  | <b>PTC-216</b> | Ti <sub>16</sub> O <sub>12</sub> (DMG) <sub>2</sub> (DHPC) <sub>2</sub> (O <sup>i</sup> Pr) <sub>28</sub>    | 3288.79                   | <i>P</i> -1                        | 15.4097(7)  | 15.8879(6)  | 17.9294(7)  | 109.617(3) | 96.107(3)  | 95.889(3)  | 4066.3(3)          | 6.78  |
| 7.  | <b>PTC-217</b> | Ti <sub>12</sub> O <sub>8</sub> (DMG) <sub>2</sub> (BETC)(O <sup>i</sup> Pr) <sub>24</sub>                   | 2718.99                   | <i>P</i> -1                        | 14.7714(7)  | 15.1120(7)  | 16.8580(7)  | 93.516(4)  | 111.982(4) | 100.404(4) | 3397.7(3)          | 7.19  |
| 8.  | <b>PTC-218</b> | Ti <sub>20</sub> O <sub>12</sub> (DMG) <sub>4</sub> (TCPP)(O <sup>i</sup> Pr) <sub>44</sub>                  | 4992.30                   | <i>P</i> 2 <sub>1</sub> / <i>c</i> | 22.1405(13) | 26.7150(10) | 25.288(3)   | 90         | 120.487(5) | 90         | 12889.5(19)        | 12.53 |

**Table S3.** Crystallographic data and structure refinement summary for **PTC-211** to **PTC-214**.

|                                                                                         | <b>PTC-211</b>                                                                   | <b>PTC-212</b>                                                                   | <b>PTC-213</b>                                                                   | <b>PTC-214</b>                                                                   |
|-----------------------------------------------------------------------------------------|----------------------------------------------------------------------------------|----------------------------------------------------------------------------------|----------------------------------------------------------------------------------|----------------------------------------------------------------------------------|
| Empirical formula                                                                       | C <sub>82</sub> H <sub>170</sub> N <sub>4</sub> O <sub>36</sub> Ti <sub>10</sub> | C <sub>82</sub> H <sub>171</sub> N <sub>5</sub> O <sub>36</sub> Ti <sub>10</sub> | C <sub>82</sub> H <sub>169</sub> N <sub>5</sub> O <sub>38</sub> Ti <sub>10</sub> | C <sub>86</sub> H <sub>172</sub> N <sub>4</sub> O <sub>36</sub> Ti <sub>10</sub> |
| M <sub>r</sub>                                                                          | 2266.90                                                                          | 2281.91                                                                          | 2311.89                                                                          | 2316.95                                                                          |
| T/K                                                                                     | 293(2)                                                                           | 293(2)                                                                           | 99.98(13)                                                                        | 293(2)                                                                           |
| Crystal system                                                                          | Monoclinic                                                                       | Triclinic                                                                        | Triclinic                                                                        | Monoclinic                                                                       |
| Space group                                                                             | <i>P</i> 2 <sub>1</sub> / <i>n</i>                                               | <i>P</i> -1                                                                      | <i>P</i> -1                                                                      | <i>P</i> 2 <sub>1</sub> / <i>c</i>                                               |
| a/Å                                                                                     | 10.9245(2)                                                                       | 12.2992(10)                                                                      | 11.8011(4)                                                                       | 19.4857(4)                                                                       |
| b/Å                                                                                     | 23.0505(6)                                                                       | 14.3904(15)                                                                      | 13.8482(7)                                                                       | 26.4883(7)                                                                       |
| c/Å                                                                                     | 23.9209(6)                                                                       | 19.0996(17)                                                                      | 18.9934(7)                                                                       | 22.5872(5)                                                                       |
| α (°)                                                                                   | 90                                                                               | 85.923(8)                                                                        | 82.343(4)                                                                        | 90                                                                               |
| β (°)                                                                                   | 92.241(2)                                                                        | 85.061(7)                                                                        | 85.367(3)                                                                        | 94.059(2)                                                                        |
| γ (°)                                                                                   | 90                                                                               | 66.484(9)                                                                        | 70.160(4)                                                                        | 90                                                                               |
| V/Å <sup>3</sup>                                                                        | 6019.0(2)                                                                        | 3085.7(5)                                                                        | 2891.6(2)                                                                        | 11629.0(5)                                                                       |
| Z                                                                                       | 2                                                                                | 1                                                                                | 1                                                                                | 4                                                                                |
| Dc/mg m <sup>-3</sup>                                                                   | 1.251                                                                            | 1.228                                                                            | 1.324                                                                            | 1.325                                                                            |
| μ/mm <sup>-1</sup>                                                                      | 5.919                                                                            | 5.778                                                                            | 6.187                                                                            | 0.720                                                                            |
| indep reflns [ <i>I</i> > 2σ( <i>I</i> )]                                               | 11931                                                                            | 12141                                                                            | 11438                                                                            | 18245                                                                            |
| F(000)                                                                                  | 2396                                                                             | 1205                                                                             | 1213                                                                             | 4904                                                                             |
| GOF                                                                                     | 1.032                                                                            | 1.065                                                                            | 0.989                                                                            | 1.094                                                                            |
| R <sub>1</sub> <sup>a</sup> , wR <sub>2</sub> <sup>b</sup> [ <i>I</i> > 2σ( <i>I</i> )] | 0.0691, 0.2097                                                                   | 0.1334, 0.3760                                                                   | 0.0991, 0.2935                                                                   | 0.0771, 0.1818                                                                   |
| R <sub>1</sub> <sup>a</sup> , wR <sub>2</sub> <sup>b</sup> (all data)                   | 0.0955, 0.2353                                                                   | 0.1869, 0.4470                                                                   | 0.1234, 0.3370                                                                   | 0.1024, 0.1911                                                                   |

$$^a R_1 = \sum(|F_o| - |F_c|) / \sum |F_o|, \quad ^b wR_2 = [\sum w(|F_o|^2 - |F_c|^2)^2 / \sum w(F_o^2)]^{1/2}.$$

**Table S4.** Crystallographic data and structure refinement summary for **PTC-215** to **PTC-218**.

|                                                                                         | <b>PTC-215</b>                                                                                  | <b>PTC-216</b>                                                                    | <b>PTC-217</b>                                                                   | <b>PTC-218</b>                                                                     |
|-----------------------------------------------------------------------------------------|-------------------------------------------------------------------------------------------------|-----------------------------------------------------------------------------------|----------------------------------------------------------------------------------|------------------------------------------------------------------------------------|
| Empirical formula                                                                       | C <sub>86</sub> H <sub>174</sub> N <sub>4</sub> O <sub>38</sub> S <sub>2</sub> Ti <sub>10</sub> | C <sub>111</sub> H <sub>220</sub> O <sub>57</sub> N <sub>4</sub> Ti <sub>16</sub> | C <sub>96</sub> H <sub>198</sub> N <sub>4</sub> O <sub>46</sub> Ti <sub>12</sub> | C <sub>196</sub> H <sub>358</sub> N <sub>12</sub> O <sub>72</sub> Ti <sub>20</sub> |
| M <sub>r</sub>                                                                          | 2415.10                                                                                         | 3288.79                                                                           | 2718.99                                                                          | 4992.30                                                                            |
| T/K                                                                                     | 293(2)                                                                                          | 293(2)                                                                            | 293(2)                                                                           | 293(2)                                                                             |
| Crystal system                                                                          | Triclinic                                                                                       | Triclinic                                                                         | Triclinic                                                                        | Monoclinic                                                                         |
| Space group                                                                             | <i>P</i> -1                                                                                     | <i>P</i> -1                                                                       | <i>P</i> -1                                                                      | <i>P</i> 2 <sub>1</sub> / <i>c</i>                                                 |
| <i>a</i> /Å                                                                             | 13.1334(4)                                                                                      | 15.4097(7)                                                                        | 14.7714(7)                                                                       | 22.1405(13)                                                                        |
| <i>b</i> /Å                                                                             | 23.0232(10)                                                                                     | 15.8879(6)                                                                        | 15.1120(7)                                                                       | 26.7150(10)                                                                        |
| <i>c</i> /Å                                                                             | 23.9960(11)                                                                                     | 17.9294(7)                                                                        | 16.8580(7)                                                                       | 25.288(3)                                                                          |
| α (°)                                                                                   | 63.989(4)                                                                                       | 109.617(3)                                                                        | 93.516(4)                                                                        | 90                                                                                 |
| β (°)                                                                                   | 78.288(3)                                                                                       | 96.107(3)                                                                         | 111.982(4)                                                                       | 120.487(5)                                                                         |
| γ (°)                                                                                   | 82.373(3)                                                                                       | 95.889(3)                                                                         | 100.404(4)                                                                       | 90                                                                                 |
| <i>V</i> /Å <sup>3</sup>                                                                | 6377.2(5)                                                                                       | 4066.3(3)                                                                         | 3397.7(3)                                                                        | 12889.5(19)                                                                        |
| <i>Z</i>                                                                                | 2                                                                                               | 1                                                                                 | 1                                                                                | 2                                                                                  |
| Dc/mg m <sup>-3</sup>                                                                   | 1.252                                                                                           | 1.313                                                                             | 1.269                                                                            | 1.286                                                                              |
| μ/mm <sup>-1</sup>                                                                      | 0.691                                                                                           | 0.812                                                                             | 0.735                                                                            | 5.583                                                                              |
| indep reflns [ <i>I</i> > 2σ( <i>I</i> )]                                               | 22977                                                                                           | 14264                                                                             | 11911                                                                            | 24068                                                                              |
| F(000)                                                                                  | 2534                                                                                            | 1674                                                                              | 1364                                                                             | 5268                                                                               |
| GOF                                                                                     | 1.174                                                                                           | 1.074                                                                             | 1.090                                                                            | 1.087                                                                              |
| R <sub>1</sub> <sup>a</sup> , wR <sub>2</sub> <sup>b</sup> [ <i>I</i> > 2σ( <i>I</i> )] | 0.1219, 0.3269                                                                                  | 0.1228, 0.3639                                                                    | 0.1115, 0.3081                                                                   | 0.1490, 0.3694                                                                     |
| R <sub>1</sub> <sup>a</sup> , wR <sub>2</sub> <sup>b</sup> (all data)                   | 0.2051, 0.4041                                                                                  | 0.1695, 0.4190                                                                    | 0.1663, 0.3594                                                                   | 0.2870, 0.4859                                                                     |

$$^a R_1 = \sum(|F_o| - |F_c|) / \sum |F_o|, \quad ^b wR_2 = [\sum w(|F_o|^2 - |F_c|^2)^2 / \sum w(F_o^2)]^{1/2}.$$

## 6. References

- (1) W. W. Wendlandt; H. G. Hecht, *Reflectance Spectroscopy*. Interscience: New York, 1966; p593.
- (2) Sheldrick, G. M. SADABS, *Program for area detector adsorption correction*. Institute for Inorganic Chemistry, University of Göttingen, Göttingen (Germany), 1996.
- (3) Sheldrick, G. M. SHELXL-97, *Program for solution of crystal structures*. University of Göttingen, Göttingen (Germany), 1997.
